# Supplementary material for: Estimating lateral nitrogen transfer through the global river network using a land surface model
Source: Copernicus journal article supplement (doi:10.5194/esd-2024-29), 2024-08-28
Supplement: Supplementary file 1 [file esd-2024-29-supplement.pdf]

*Supplement of*

**Estimating the global lateral transfer of nitrogen through river network using a land surface model**

Minna Ma<sup>1\*</sup>, Haicheng Zhang<sup>2</sup>, Ronny Lauerwald<sup>3</sup>, Philippe Ciais<sup>4</sup>,  
Pierre Regnier<sup>1</sup>

<sup>1</sup> Department Geoscience, Environment & Society-BGEOSYS, Université libre de Bruxelles, 1050 Bruxelles, Belgium

<sup>2</sup> School of Geography and Planning, Sun Yat-sen University, Guangzhou, Guangdong, 510006, China

<sup>3</sup> Université Paris-Saclay, INRAE, AgroParisTech, UMR ECOSYS, Palaiseau, France

<sup>4</sup> Laboratoire des Sciences du Climat et de l'Environnement, IPSL-LSCE CEA/CNRS/UVSQ, Orme des Merisiers, 91191, Gif sur Yvette, France

Table S1. Information of observational sites from literature.

| Site           | Lat    | Long   | Mean TN flow<br>(Tg/yr) | Periods   | Reference               |
|----------------|--------|--------|-------------------------|-----------|-------------------------|
| Rio Canague    | 8.03   | -69.99 | 0.048                   | 1990-1999 | Lewis et al., 1999      |
| Rio Caroni     | 6.00   | -62.85 | 0.049                   | 1990-1999 | Lewis et al., 1999      |
| Gambia River   | 13.32  | -14.21 | 0.005                   | 1990-1999 | Lewis et al., 1999      |
| Trombetas      | 0.02   | -58.01 | 0.039                   | 1990-1999 | Lewis et al., 1999      |
| Japura         | -1.87  | -67.00 | 0.258                   | 1982-1990 | Lewis et al., 1999      |
| Madeira        | -8.00  | -62.87 | 0.550                   | 1990-1999 | Lewis et al., 1999      |
| Negro          | -0.01  | -67.19 | 0.091                   | 1990-1999 | Lewis et al., 1999      |
| Orinoco        | 7.00   | -67.07 | 0.568                   | 1990-1999 | Lewis et al., 1999      |
| Paraguay River | -19.03 | -57.36 | 0.027                   | 1990-1999 | Lewis et al., 1999      |
| Manacapuru     | -3.15  | -60.01 | 1.895                   | 1990      | Hedges et al., 1994     |
| Içà            | -1.40  | -69.44 | 0.124                   | 1982-1990 | Hedges et al., 1994     |
| Vargem Grande  | -3.50  | -69.33 | 1.242                   | 1982-1990 | Hedges et al., 1994     |
| Purus          | -4.10  | -61.57 | 0.378                   | 1982-1990 | Martinelli et al., 2010 |
| Óbidos         | -1.93  | -55.52 | 2.815                   | 1969-1970 | Salati et al., 1982     |
| Han Jiang      | 30.51  | 113.09 | 0.170                   |           |                         |
| Yangtze river  | 30.76  | 117.68 | 1.820                   |           |                         |
| Huaihe         | 32.95  | 117.27 | 0.087                   | 2014-2015 | <sup>a</sup>            |
| Tongtian river | 33.01  | 97.26  | 0.110                   |           |                         |
| Yellow river   | 34.92  | 112.40 | 0.340                   |           |                         |

<sup>a</sup> [http://envi.ckceest.cn/environment/data\\_Integration/data\\_Integration.jsp](http://envi.ckceest.cn/environment/data_Integration/data_Integration.jsp)

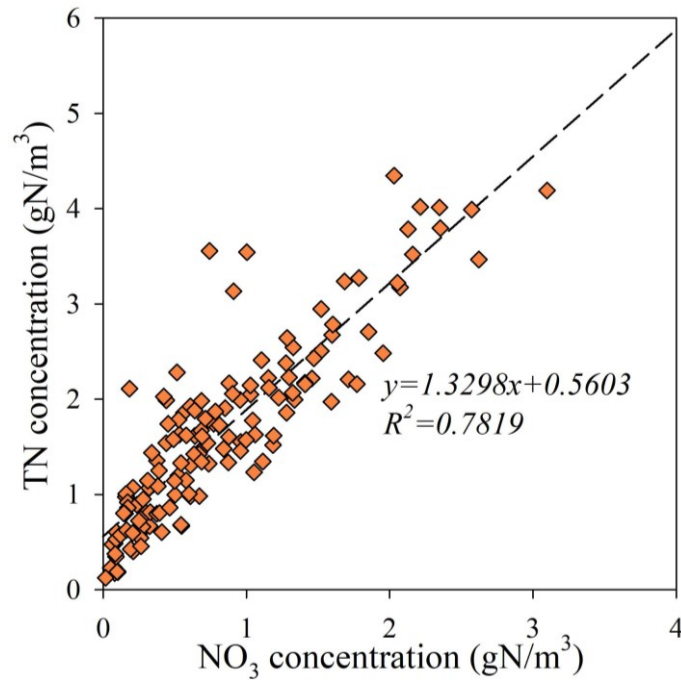

Figure S1. Linear regression relationship between TN concentration and  $\text{NO}_3^-$  concentration in rivers based on data from GRQA.

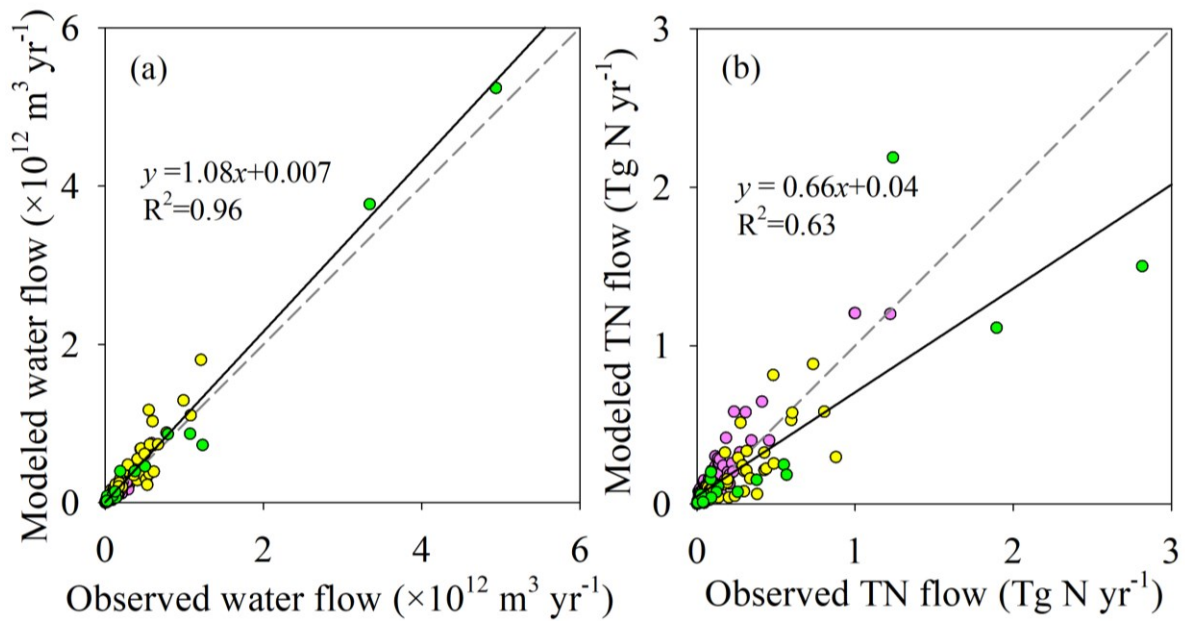

Figure S2. The evaluation of ORCHIDEE-NLAT, comparison between observed and simulated water (a) and TN flow (b). Pink symbols represent sites with observations of TN from GRQA, yellow symbols represent GRQA sites for which TN concentrations were estimated from observations of  $\text{NO}_3^-$ , and green symbols represent sites with observations of TN from published literature.

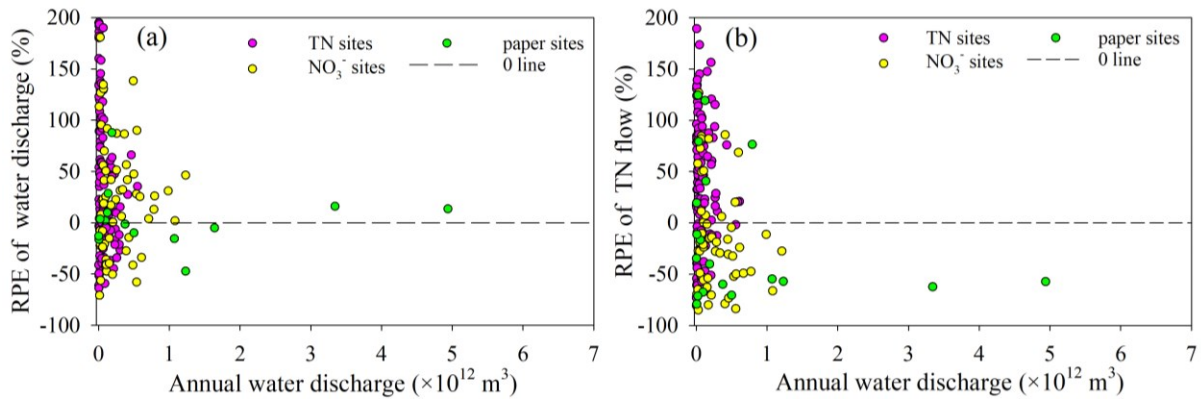

Figure S3. The evaluation of ORCHIDEE-NLAT, comparison between observed and simulated water (a) and TN flow (b).

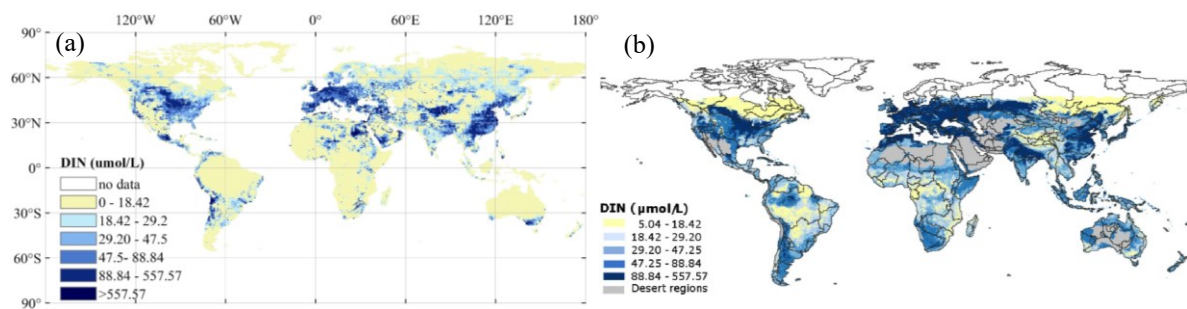

Figure S4. Spatial distribution of DIN concentration: (a) DIN concentration simulated by ORCHIDEE-NLAT; (b) DIN concentration simulated by semi-empirical (observation-based) model from Marzadri et al (2021).

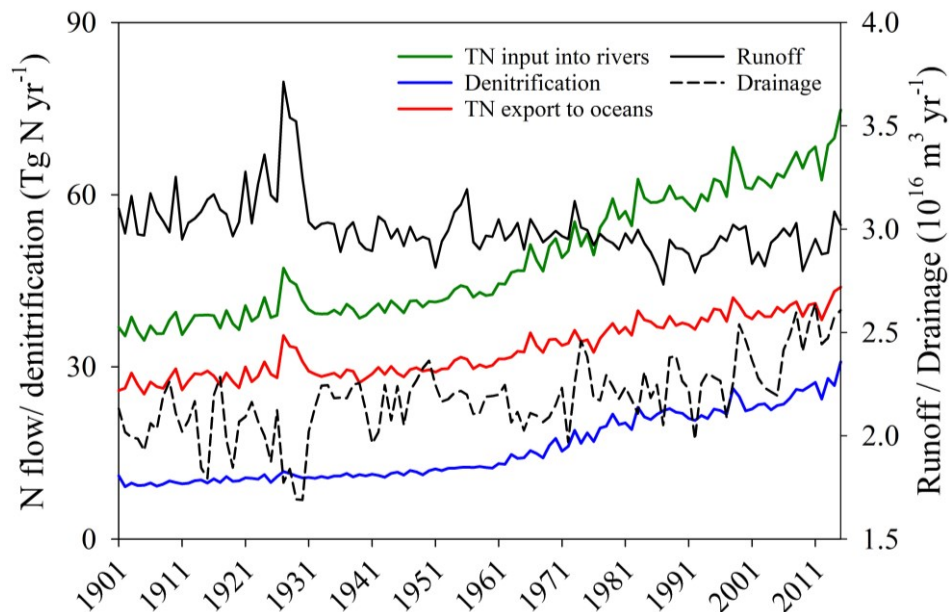

Figure S5. Global annual N flows, runoff and drainage from 1901 to 2014.

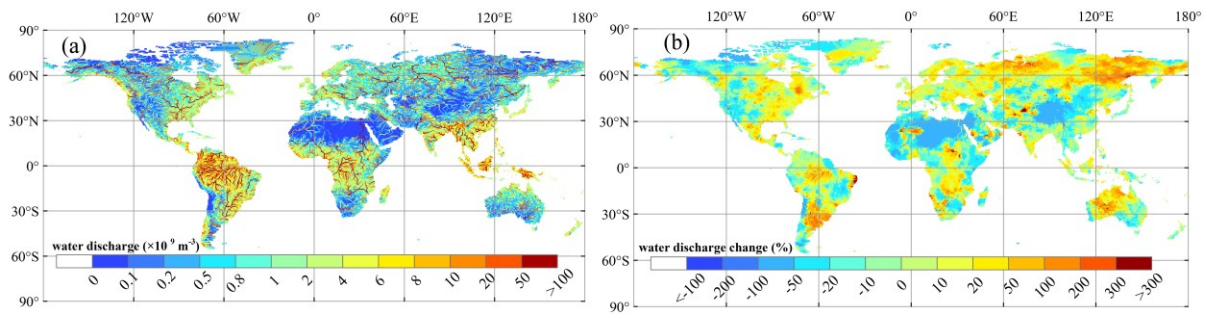

Figure S6. Spatial patterns of water: (a) average annual water discharge over 2001-2014; (b) water discharge changes from the reference period 1901–1910 to 2001–2014.

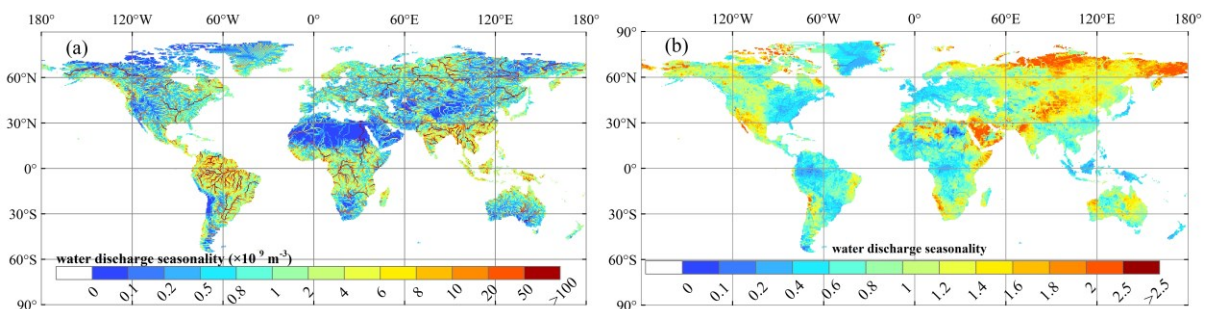

Figure S7. Spatial patterns of water discharge seasonality over 2001-2014: (a) water discharge seasonality; (b) normalized water discharge seasonality (=water discharge seasonality/ averaged annual water discharge).

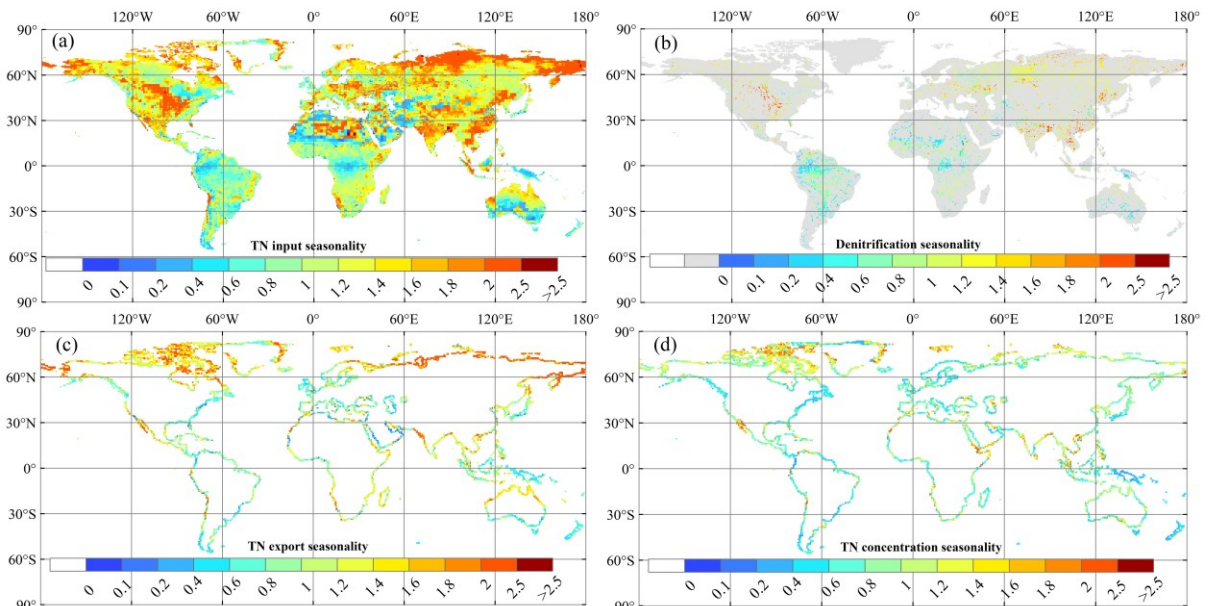

Figure S8. Spatial distribution of normalized seasonality for TN and denitrification over 2001-2014: (a) TN inputs into rivers; (b) TN exports to oceans; (c) denitrification rates; (d) TN concentrations at rivers' mouths. The normalized seasonality of TN or denitrification = seasonality of TN or denitrification / averaged annual values of TN or denitrification.

## References

Hedges, John I., Gregory L. Cowie, Jeffrey E. Richey, Paul D. Quay, Ronald Benner, Mike Strom, and Bruce R. Forsberg.: Origins and Processing of Organic Matter in the Amazon River as Indicated by Carbohydrates and Amino Acids, *Limnology and Oceanography*, 39, 743–61, <https://doi.org/10.4319/lo.1994.39.4.0743>, 1994.

Lewis, William M., John M. Melack, William H. McDowell, Michael McClain, and Jeffrey E. Richey.: Nitrogen Yields from Undisturbed Watersheds in the Americas, In *New Perspectives on Nitrogen Cycling in the Temperate and Tropical Americas: Report of the International SCOPE Nitrogen Project*, edited by Alan R. Townsend, 149–62. Dordrecht: Springer Netherlands, [https://doi.org/10.1007/978-94-011-4645-6\\_7](https://doi.org/10.1007/978-94-011-4645-6_7), 1999.

Martinelli, L. A., Coletta, L. D., Ravagnani, E. D. C., Camargo, P. B. D., Ometto, J. P. H. B., Filoso, S., Victoria, R. L. :Dissolved nitrogen in rivers: comparing pristine and impacted regions of Brazil, *Brazilian Journal of Biology*,70, 709-722, <https://doi.org/10.1590/S1519-69842010000400003>, 2010.

Salati, E., R. SYLVESTER-BRADLEY, and R. L. VICTORIA.: Regional Gains and Losses of Nitrogen in the Amazon Basin / Ganancias y Pérdidas Regionales de Nitrógeno En La Cuenca Amazónica. *Plant and Soil*, 67, 367–76, <http://www.jstor.org/stable/42934052>,1982.
